# Supplementary material for: Facile synthesis of O/N co-doped hierarchical porous carbon: for high performance supercapacitors and electromagnetic interference shielding
Source: Royal Society of Chemistry journal article supplement (doi:10.1039/d4nj01864h), 2024-01-01
Supplement: d4nj01864h1.pdf [file d4nj01864h1.pdf]

# **Facile synthesis of O/N co-doped hierarchical porous carbon: For high performance supercapacitor and electromagnetic interference shielding**

Kaiming Dong<sup>a</sup>, Zhenjie Sun<sup>a</sup>, Ge Jing<sup>b</sup>, Jiajun Wang<sup>a</sup>, Biao Tang<sup>a</sup>, Nanjin Zhao<sup>a</sup>, Lingwei Kong<sup>a</sup>,  
Weijie Yan<sup>c</sup>, Feiqiang Guo<sup>a\*</sup>

<sup>a</sup>School of Low-Carbon Energy and Power Engineering, China University of Mining and  
Technology, Xuzhou, 221116, China

<sup>b</sup>Ningbo CRRC New Energy Technology CO., LTD, Ningbo, 315112, China

<sup>c</sup>School of Energy and Power Engineering, Nanjing University of Science and Technology,  
Nanjing 210094, China

\* Corresponding author. Tel.: +86 516 83592000. E-mail address: fqguo@cumt.edu.cn

## **1. Electrochemical measurements**

To prepare the working electrode, the carbon material (80wt%), acetylene black (representing 10wt%), and polytetrafluoroethylene (PTFE, 10wt%) slurries were thoroughly mixed. Subsequently, the mixture was uniformly coated onto a nickel foam with dimensions of 1.3×1.3cm<sup>2</sup> and subjected to a continuous pressure of 10 MPa for 30 seconds. The coated sample was then dried in an oven at 105°C for 12 hours. The electrochemical performance of the work electrode was analyzed using a CHI660e electrochemical workstation, which involved cyclic voltammetry (CV), galvanostatic charge/discharge (GCD) measurements and electrochemical impedance spectroscopy (EIS). The specific capacitance ( $C_s$ ) of the electrode can be calculated using Eq. (S1).

$$C_s = \frac{I_d \times \Delta t}{m_1 \times a \times \Delta V_1} \quad (S1)$$

Here,  $C_s$  represents the specific capacitance of electrode,  $F\ g^{-1}$ ;  $I_{d1}$  denotes the discharge current, A;  $\Delta t_1$  represents the discharge time, s;  $m_1$  represents the loading mass in the single electrode, g;  $a$  is the mass percentage of the active substance, wt%;  $\Delta V_1$  represents the discharge voltage window, V.

The total mass loading of SC-90, SC-120, and SC-150 electrodes is shown in Table S2. The total mass loading consisted the binder (PTFE, 10wt%), conductive agent (acetylene black, 10wt%), and O/N co-doped hierarchical porous carbon (80wt%) in the electrode. The total mass loading of SC-90, SC-120, and SC-150 electrodes is 4.2, 4.0 and 3.5 mg, respectively.

A symmetric supercapacitor (S-SSC) was prepared using SC-120 as the electrode and the cellulose membrane as the separator. The electrochemical performance of the work electrode was analyzed using a CHI660e electrochemical workstation. Moreover, the long-term stability of S-SSC was evaluated by subjecting it to a rigorous cycling test consisting of 7500 charge-discharge cycles using the Land testing system (CT3002A). Eq. (S2) - (S4) were used to calculate the energy densities and power densities of S-SSC.

$$C_m = \frac{I_{d2} \times \Delta t_2}{m_2 \times a \times \Delta V_2} \quad (S2)$$

$$E = \frac{1}{2} \times \frac{C_m \times \Delta V_2^2}{3.6} \quad (S3)$$

$$P = \frac{E}{\Delta t} \times 3600 \quad (S4)$$

Here,  $C_m$  represents the specific capacitance of S-SSC,  $F\ g^{-1}$ ;  $I_{d2}$  denotes the discharge current, A;  $\Delta t_2$  represents the discharge time, s;  $m_2$  represents the total loading mass in the two electrodes, g;

41  $a$  is the mass percentage of the active substance, wt%;  $\Delta V_2$  represents the discharge voltage window,  
 42  $V$ ;  $E$  represents the energy densities,  $W\ h\ kg^{-1}$ ;  $P$  represents the power densities  $W\ kg^{-1}$ .

## 43 2. EMI shielding measurements

44 The electromagnetic interference shielding performance of SC-120 within the frequency range  
 45 of 8.2-12.4 GHz was measured using a vector network analyzer (E5071C, Agilent) through coaxial  
 46 method. A coaxial ring with SC-120 mixed with paraffin at a mass ratio of 5:5 was prepared, and  
 47 the thickness of the coaxial ring was 1.984mm.  $SE_R$ ,  $SE_A$ , and  $SE_T$  correspond to the reflection  
 48 effectiveness, absorption effectiveness, and total EMI shielding effectiveness of the material. The  
 49 calculation process of  $SE_R$ ,  $SE_A$ , and  $SE_T$  is shown in Eq. (S5) - (S7).

50 Here,  $S_{11}$  represents the reflection coefficient, and  $S_{21}$  represents the transmission coefficient.

$$51 \quad SE_R = 10 \times \log\left(\frac{1}{1 - |S_{11}|^2}\right) \quad (S5)$$

$$52 \quad SE_A = 10 \times \log\left(\frac{1 - |S_{11}|^2}{|S_{21}|^2}\right) \quad (S6)$$

$$53 \quad SE_T = SE_R + SE_A \quad (S7)$$

54 The electromagnetic shielding efficiency (%) refers to the percentage representation of the  
 55 electromagnetic shielding capability. It indicates the extent to which materials reduce the effects of  
 56 blocking, reflecting, or absorbing electromagnetic waves relative to the incident electromagnetic  
 57 waves. The electromagnetic shielding efficiency (%) was calculated by Eq. (S8).

$$58 \quad \text{Electromagnetic shielding efficiency (\%)} = 100 - \left(\frac{1}{10^{\frac{SE_T}{10}}}\right) * 100 \quad (S8)$$

59 Table S1 The production yield of sesame meal coke, SC-90, SC-120, and SC-150

| Sample               | esame meal coke | SC-90 | SC-120 | SC-150 |
|----------------------|-----------------|-------|--------|--------|
| production yield (%) | 32.96           | 8.67  | 8.26   | 7.93   |

60

61 Table S2 The total mass loading and carbon mass loading of SC-90, SC-120, and SC-150

62 electrodes

| Sample                  | SC-90 | SC-120 | SC-150 |
|-------------------------|-------|--------|--------|
| Total mass loading (mg) | 4.2   | 4.0    | 3.5    |

63

64

65
